# Supplementary material for: Reconstructing tumor evolutionary histories and clone trees in polynomial-time with SubMARine
Source: PubMed Central journal article supplement (PMC7845980; doi:10.1371/journal.pcbi.1008400), 2021-01-19

**A**

Proportion of subclones with uncertain parentage  
for any number of subclones without CNAs

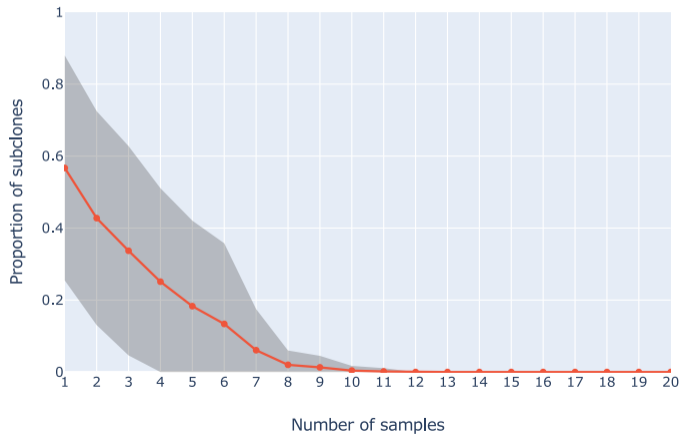**B**

Proportion of subclones with uncertain parentage  
for any number of segments and CNAs

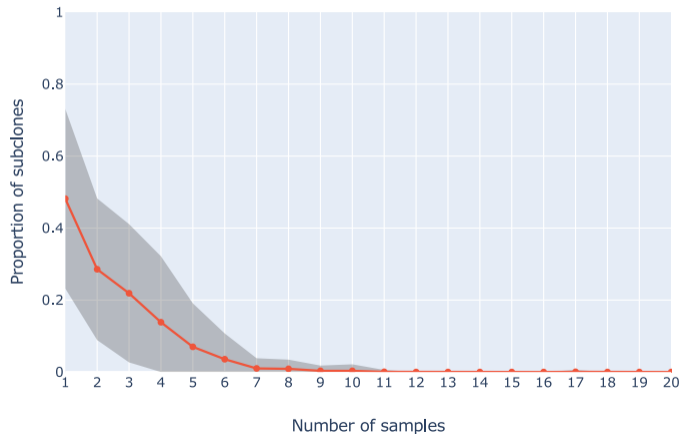

Supplement: pcbi.1008400.s006.pdf [file pcbi.1008400.s006.pdf]
