# Supplementary material for: Reconstructing tumor evolutionary histories and clone trees in polynomial-time with SubMARine
Source: PubMed Central journal article supplement (PMC7845980; doi:10.1371/journal.pcbi.1008400), 2021-01-19

**A**

Proportion of subclones with uncertain parentage  
for 5 subclones without CNAs

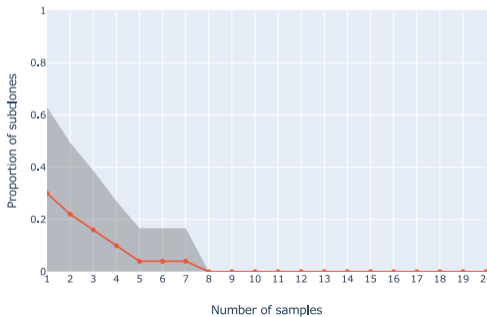**B**

Proportion of subclones with uncertain parentage  
for 20 subclones without CNAs

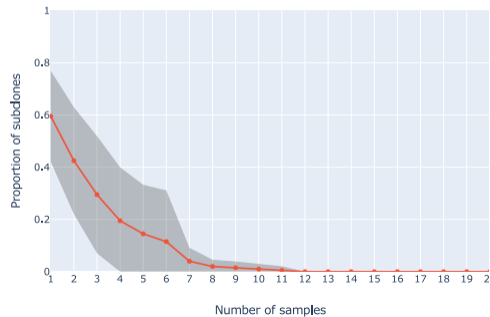**C**

Proportion of subclones with uncertain parentage  
for 50 subclones without CNAs

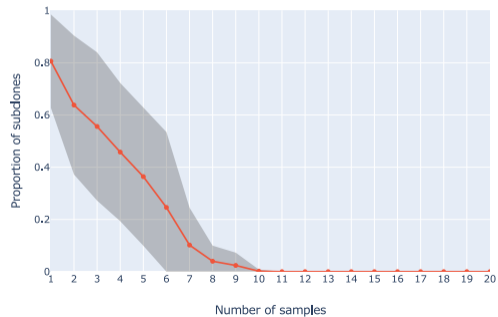

Supplement: pcbi.1008400.s007.pdf [file pcbi.1008400.s007.pdf]
