# Supplementary material for: Reconstructing tumor evolutionary histories and clone trees in polynomial-time with SubMARine
Source: PubMed Central journal article supplement (PMC7845980; doi:10.1371/journal.pcbi.1008400), 2021-01-19

**A**

Proportion of subclones with uncertain parentage  
for 10 segments and 10 CNAs

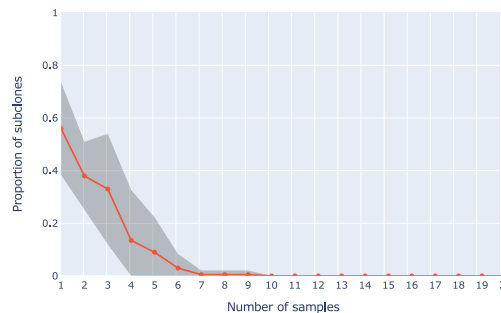**B**

Proportion of subclones with uncertain parentage  
for 10 segments and 20 CNAs

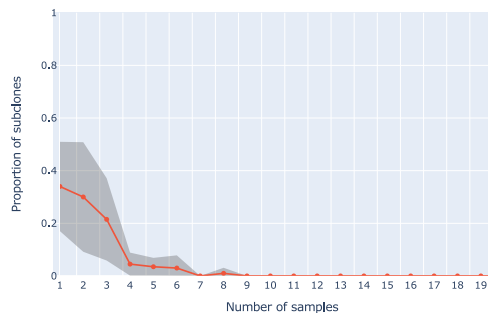**C**

Proportion of subclones with uncertain parentage  
for 10 segments and 40 CNAs

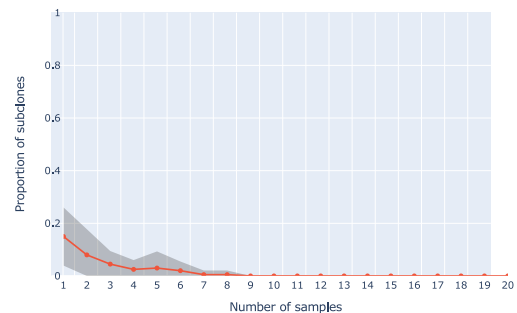**D**

Proportion of subclones with uncertain parentage  
for 20 segments and 10 CNAs

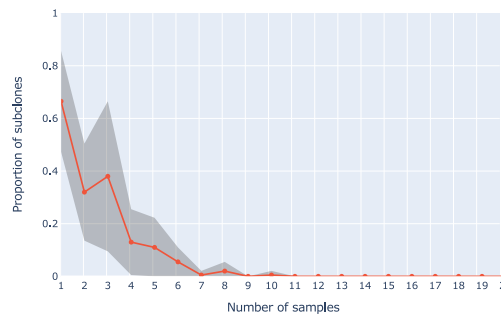**E**

Proportion of subclones with uncertain parentage  
for 20 segments and 20 CNAs

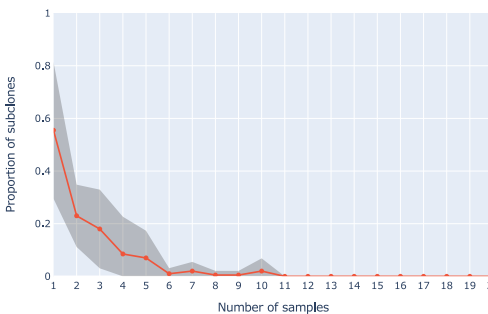**F**

Proportion of subclones with uncertain parentage  
for 20 segments and 40 CNAs

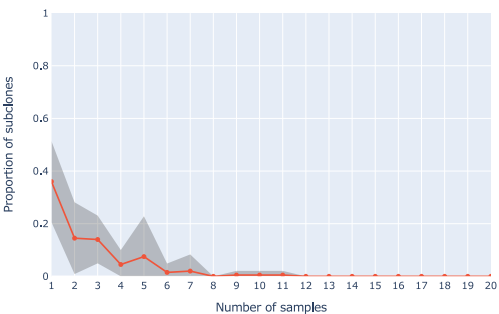**G**

Proportion of subclones with uncertain parentage  
for 40 segments and 10 CNAs

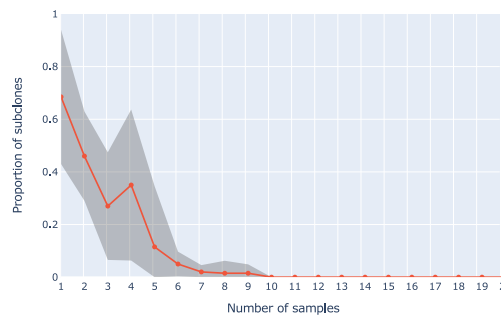**H**

Proportion of subclones with uncertain parentage  
for 40 segments and 20 CNAs

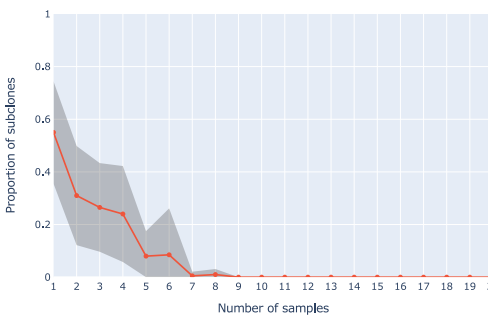**I**

Proportion of subclones with uncertain parentage  
for 40 segments and 40 CNAs

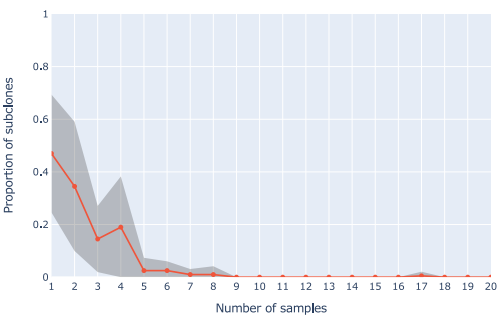

Supplement: pcbi.1008400.s008.pdf [file pcbi.1008400.s008.pdf]
