# Supplementary material for: Reconstructing tumor evolutionary histories and clone trees in polynomial-time with SubMARine
Source: PubMed Central journal article supplement (PMC7845980; doi:10.1371/journal.pcbi.1008400), 2021-01-19

A

Dataset without CNAs

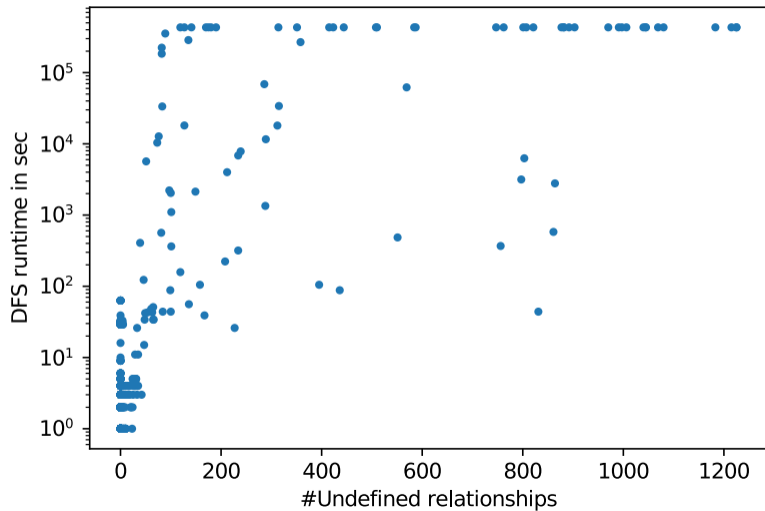

B

Dataset with CNAs

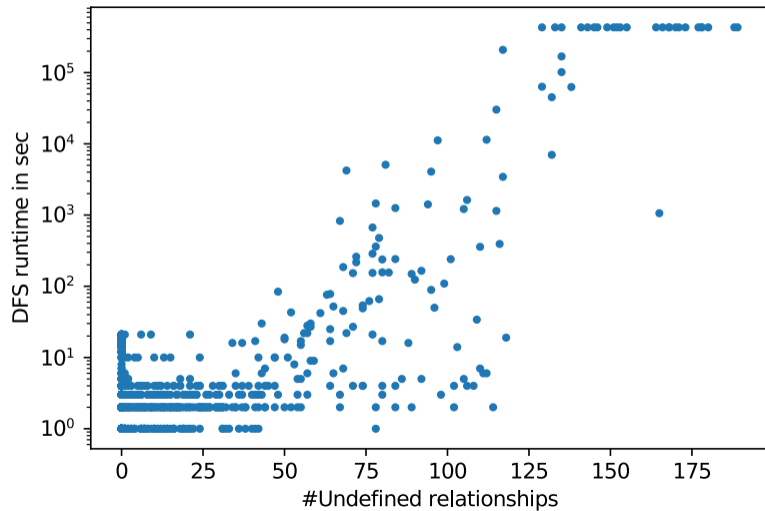

Supplement: pcbi.1008400.s010.pdf [file pcbi.1008400.s010.pdf]
