# Supplementary material for: Reconstructing tumor evolutionary histories and clone trees in polynomial-time with SubMARine
Source: PubMed Central journal article supplement (PMC7845980; doi:10.1371/journal.pcbi.1008400), 2021-01-19
Supplement: pcbi.1008400.s012.pdf [file pcbi.1008400.s012.pdf]

# Noise buffers among the simulated data with noise

## effective read depth of 30

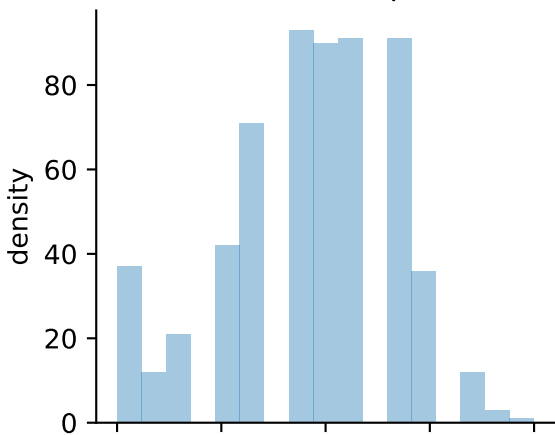

## effective read depth of 100

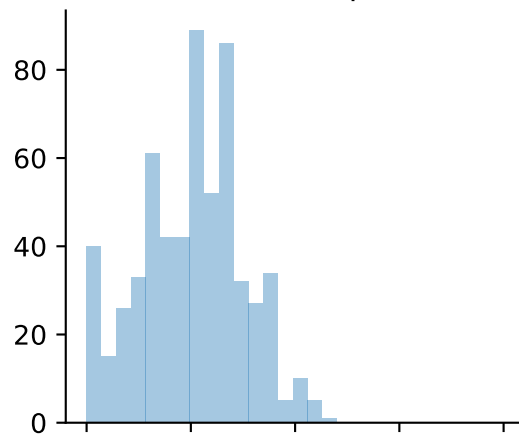

## effective read depth of 300

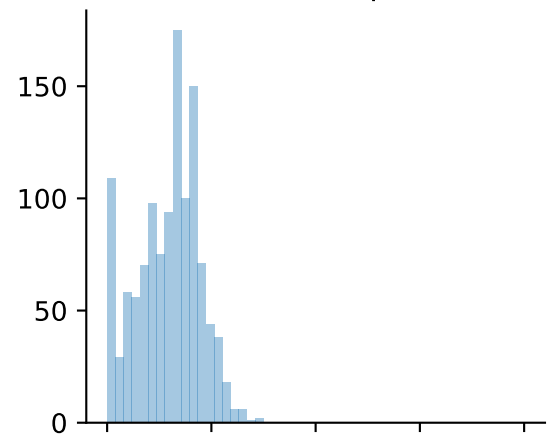

## effective read depth of 1000

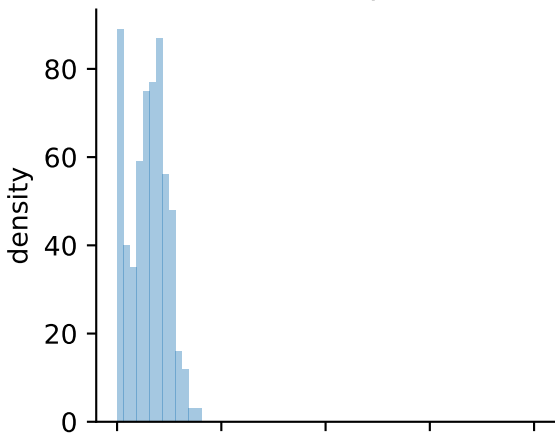

## effective read depth of 3000

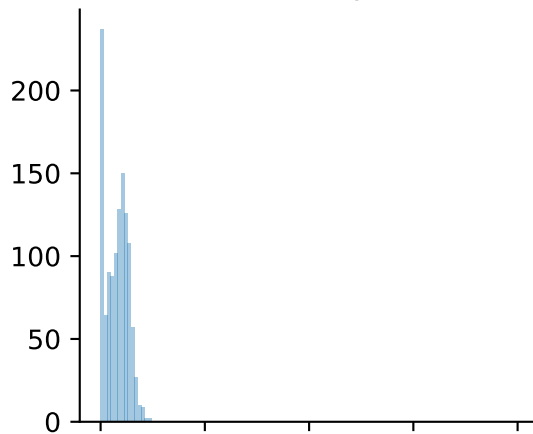

## effective read depth of 10000

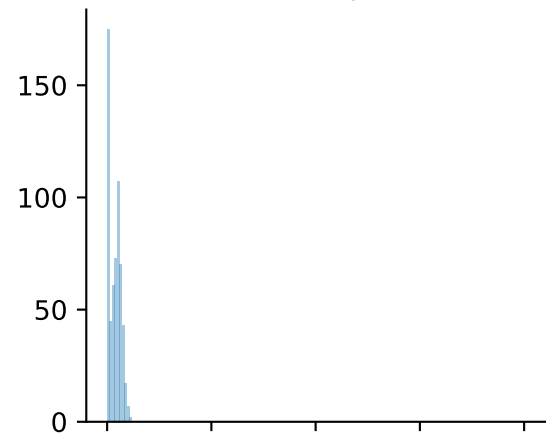

## effective read depth of 30000

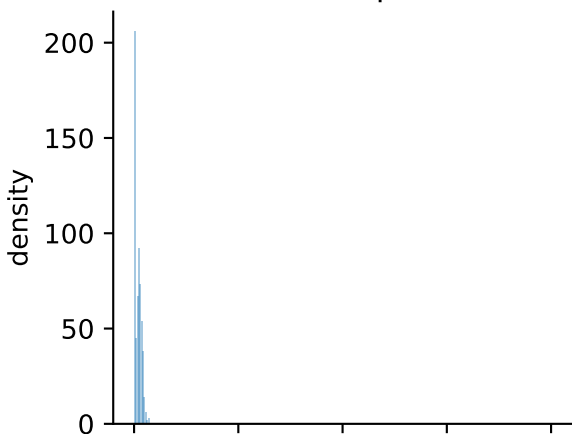

maximum value in the noise buffer set

maximum value in the noise buffer set

maximum value in the noise buffer set
