# Supplementary material for: Reconstructing tumor evolutionary histories and clone trees in polynomial-time with SubMARine
Source: PubMed Central journal article supplement (PMC7845980; doi:10.1371/journal.pcbi.1008400), 2021-01-19

A

Required relationships for dataset with noise and 5 subclones

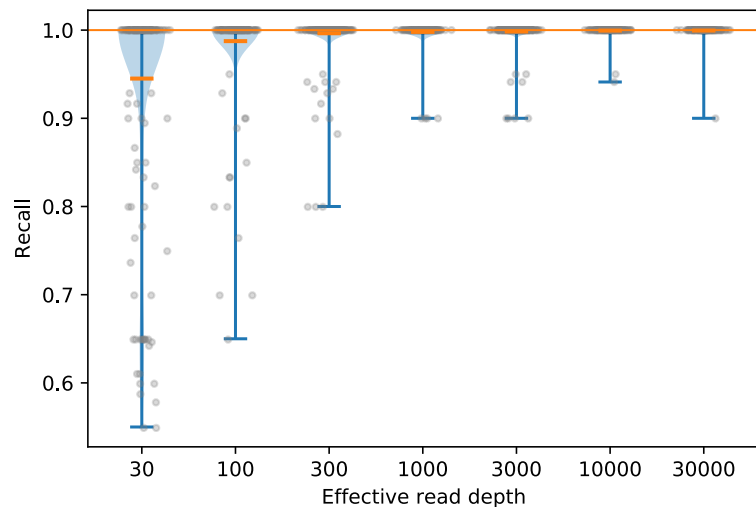

B

Differently defined error for dataset with noise and 5 subclones

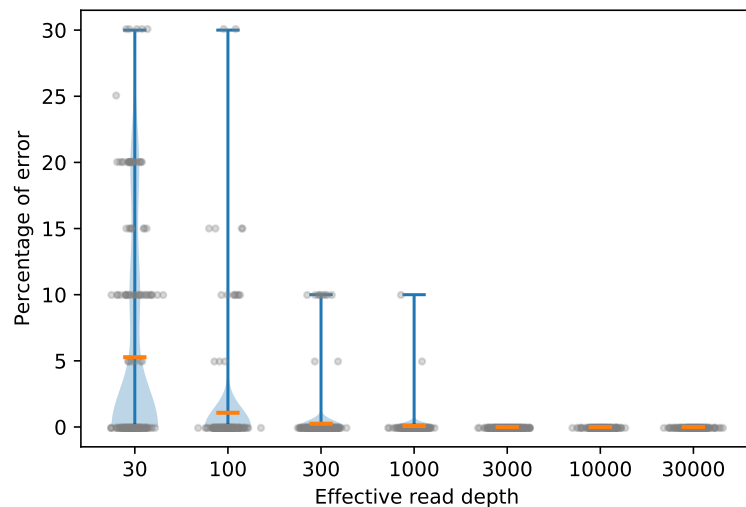

C

Required relationships for dataset with noise and 20 subclones

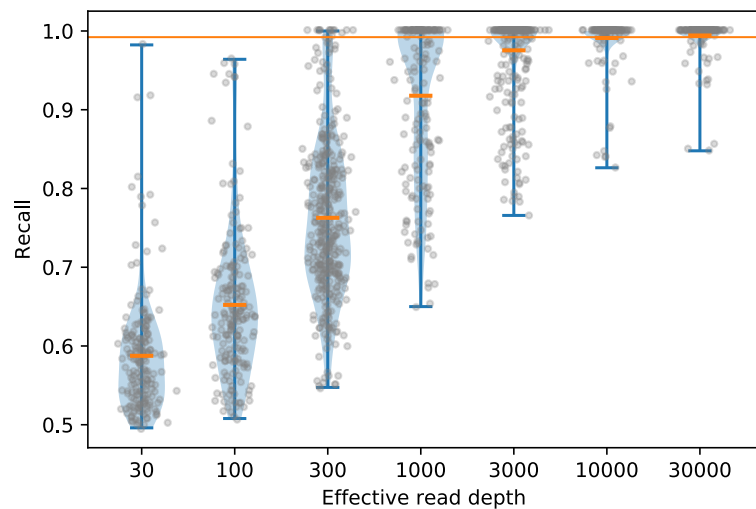

D

Differently defined error for dataset with noise and 20 subclones

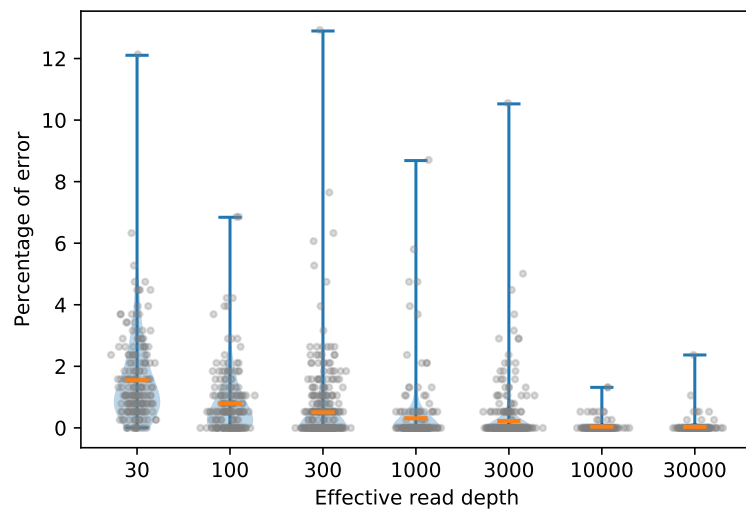

E

Required relationships for dataset with noise and 50 subclones

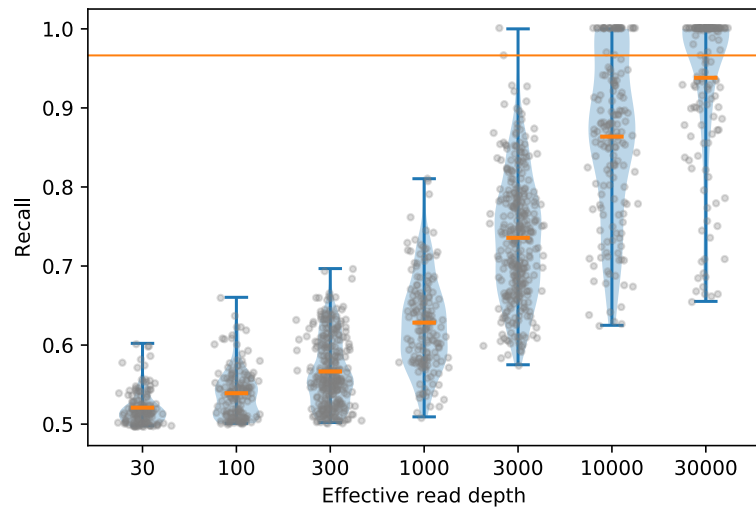

F

Differently defined error for dataset with noise and 50 subclones

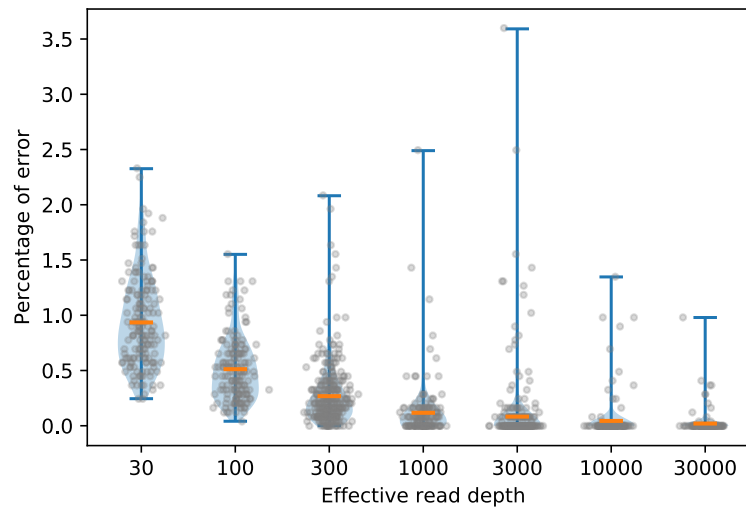

Supplement: pcbi.1008400.s018.pdf [file pcbi.1008400.s018.pdf]
