# Supplementary material for: Reconstructing tumor evolutionary histories and clone trees in polynomial-time with SubMARine
Source: PubMed Central journal article supplement (PMC7845980; doi:10.1371/journal.pcbi.1008400), 2021-01-19

A

| $\phi$ | 0    | 1    | 2    |
|--------|------|------|------|
| 0      | 1.0  | 1.0  | 1.0  |
| 1      | 1.0  | 1.0  | 1.0  |
| 2      | 0    | 0.94 | 0.81 |
| 3      | 0.67 | 0    | 0    |
| 4      | 0.96 | 0    | 0.35 |
| 5      | 0.97 | 0    | 0.89 |
| 6      | 0    | 0.94 | 0.01 |

B

CRUK0078

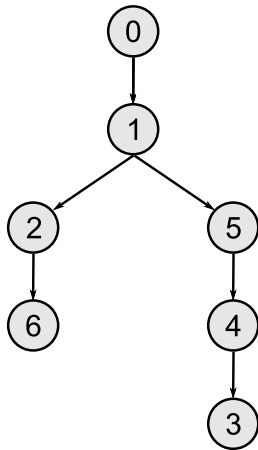

Supplement: pcbi.1008400.s021.pdf [file pcbi.1008400.s021.pdf]
