# Supplementary material for: Reconstructing tumor evolutionary histories and clone trees in polynomial-time with SubMARine
Source: PubMed Central journal article supplement (PMC7845980; doi:10.1371/journal.pcbi.1008400), 2021-01-19

A

| $\phi$ | 0    | 1    | 2    |
|--------|------|------|------|
| 0      | 1.0  | 1.0  | 1.0  |
| 1      | 0.99 | 0.99 | 0.98 |
| 4      | 0.76 | 0.91 | 0.78 |
| 2      | 0.63 | 0.25 | 0.38 |
| 3      | 0    | 0.35 | 0.05 |

B

CRUK0095

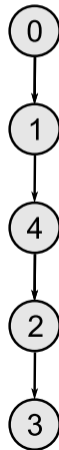

Supplement: pcbi.1008400.s022.pdf [file pcbi.1008400.s022.pdf]
