# Supplementary material for: Reconstructing tumor evolutionary histories and clone trees in polynomial-time with SubMARine
Source: PubMed Central journal article supplement (PMC7845980; doi:10.1371/journal.pcbi.1008400), 2021-01-19

### A22

adapted (raw)

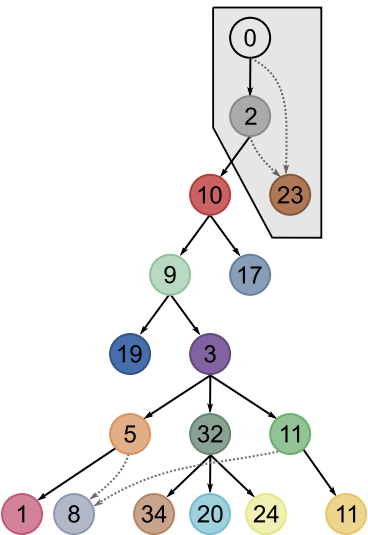

### A24

raw & adapted

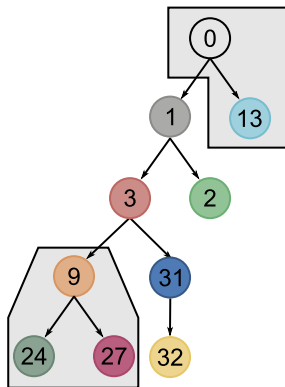

### A29

adapted (raw)

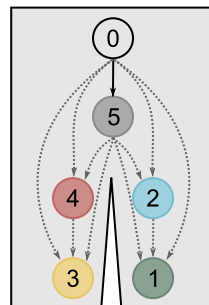

### A31

adapted

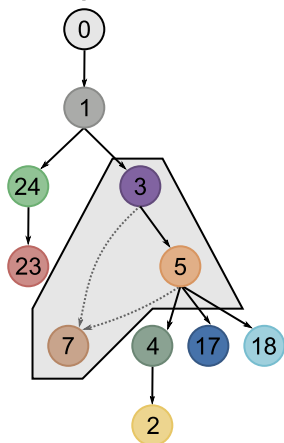

### A34

raw

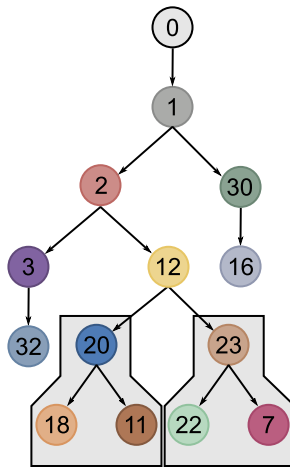

Supplement: pcbi.1008400.s023.pdf [file pcbi.1008400.s023.pdf]
