# Supplementary material for: Reconstructing tumor evolutionary histories and clone trees in polynomial-time with SubMARine
Source: PubMed Central journal article supplement (PMC7845980; doi:10.1371/journal.pcbi.1008400), 2021-01-19
Supplement: pcbi.1008400.s025.pdf [file pcbi.1008400.s025.pdf]

| <b>inference rule</b> | <b>functional description</b>                                                                                                           | <b>impact</b>                                                            | <b>application</b>                                                    |
|-----------------------|-----------------------------------------------------------------------------------------------------------------------------------------|--------------------------------------------------------------------------|-----------------------------------------------------------------------|
| lost allele rules     |                                                                                                                                         |                                                                          |                                                                       |
| i)                    | $Z_{t+1} \leftarrow f_{lost_{z_0}}(\Delta C_A, \Delta C_B, \lambda_s, \lambda_c, \sigma_s, \sigma_c, \pi_c, \pi_{s_t}, Z_t)$            | $Z(k, k') = 0$ (see Eqs (4), (6), and (7) in Section I in S1 Text)       | once, and then every time a new 1 is set in $Z$ and an SSM got phased |
| ii)                   | $\pi_{s_0} \leftarrow f_{lost_{pha}}(\Delta C_A, \Delta C_B, \lambda_s, \lambda_c, \sigma_s, \sigma_c, \pi_c, Z_t)$                     | $\pi_s(j) = \rho(\pi_c(l))$ (see Eq (8) in Section I in S1 Text)         | once, and then every time a new 1 is set in $Z$                       |
| equivalence rules     |                                                                                                                                         |                                                                          |                                                                       |
| i)                    | $Z_0 \leftarrow f_{eq_{z_1}}(\mathcal{M}, \lambda_s, \lambda_c)$                                                                        | $Z(k, k') = 1$ (see Eq (13) in Section IV.3 in S1 Text)                  | once                                                                  |
| ii)                   | $\pi_{s_0} \leftarrow f_{eq_{samepha}}(\mathcal{M}, \lambda_s, \lambda_c, \pi_c)$                                                       | $\pi_s(j) = \pi_c(l)$ (see Eq (14) in Section IV.3 in S1 Text)           | once                                                                  |
| iii)                  | $\pi_{s_0} \leftarrow f_{eq_{difpha}}(\mathcal{M}, \lambda_s, \lambda_c, \pi_c, Z_t)$                                                   | $\pi_s(j) = \rho(\pi_c(l))$ (see Eq (15) in Section IV.3 in S1 Text)     | once, and then every time a new 1 is set in $Z$                       |
| iv)                   | $Z_{t+1} \leftarrow f_{eq_{z_0}}(\mathcal{M}, \Delta C_A, \Delta C_B, \lambda_s, \lambda_c, \sigma_s, \sigma_c, \pi_c, \pi_{s_t}, Z_t)$ | $Z(k, k') = 0$ (see Eqs (16), (17), and (18) in Section IV.3 in S1 Text) | once, and then every time a new 1 is set in $Z$ and an SSM got phased |
